# Supplementary material for: Hydroxyl in eclogitic garnet, orthopyroxene, and oriented inclusion-bearing clinopyroxene, western Norway
Source: Copernicus journal article supplement (doi:10.5194/se-16-233-2025), 2025-03-13
Supplement: Supplementary file 1 [file se-16-233-2025-supplement.zip]

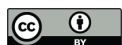

## *Supplement of*

# **Hydroxyl in eclogitic garnet, orthopyroxene, and oriented inclusion-bearing clinopyroxene, western Norway**

**Dirk Spengler et al.**

*Correspondence to:* Dirk Spengler ([dirk@spengler.eu](mailto:dirk@spengler.eu))

- [se-16-233-2025-supplement-title-page.pdf](#)
- [FTIR\\_raw\\_spectral\\_files.zip](#)
- [Summary\\_FTIR\\_raw\\_spectral\\_files.ods](#)
- [Supplement-info.pdf](#)
- [Supplementary\\_tables\\_figures.pdf](#)

The copyright of individual parts of the supplement might differ from the article licence.
