# Supplementary material for: Hydroxyl in eclogitic garnet, orthopyroxene, and oriented inclusion-bearing clinopyroxene, western Norway
Source: Copernicus journal article supplement (doi:10.5194/se-16-233-2025), 2025-03-13
Supplement: Supplementary file 2 [file se-16-233-2025-supplement.zip]

**Table S1.** Amphibole average compositions (wt%; unpublished data from the study of Spengler et al., 2023).

| Sample type                    | Opx-free eclogite |        |
|--------------------------------|-------------------|--------|
| Sample no.                     | DS1438            |        |
| Grain type                     | lamellae          | matrix |
| <i>n</i>                       | 6                 | 4      |
| SiO <sub>2</sub>               | 46.9              | 45.0   |
| TiO <sub>2</sub>               | 0.22              | 0.06   |
| Al <sub>2</sub> O <sub>3</sub> | 15.4              | 17.0   |
| Cr <sub>2</sub> O <sub>3</sub> | 0.12              | 0.08   |
| FeO                            | 2.69              | 4.37   |
| MnO                            | 0.01              | 0.05   |
| MgO                            | 17.7              | 16.8   |
| CaO                            | 12.6              | 12.1   |
| Na <sub>2</sub> O              | 2.50              | 2.47   |
| K <sub>2</sub> O               | 0.02              | 0.14   |
| H <sub>2</sub> O <sup>+</sup>  | 1.74              | 1.72   |
| F                              | 0.87              | 0.89   |
| Cl                             | 0.00              | 0.01   |
| Total                          | 100.5             | 100.2  |
| <i>Cations per 24 O</i>        |                   |        |
| Si                             | 6.469             | 6.298  |
| Ti                             | 0.023             | 0.007  |
| Al                             | 2.513             | 2.798  |
| Cr                             | 0.013             | 0.009  |
| Fe <sup>2+</sup>               | 0.311             | 0.512  |
| Mn                             | 0.001             | 0.006  |
| Mg                             | 3.650             | 3.499  |
| Ca                             | 1.873             | 1.815  |
| Na                             | 0.672             | 0.670  |
| K                              | 0.004             | 0.024  |
| OH                             | 1.617             | 1.605  |
| F                              | 0.382             | 0.393  |
| Cl                             | 0.001             | 0.001  |
| Total                          | 15.556            | 15.638 |
| Species                        | Prg               | Prg    |

Amphibole classification after Locock (2014),  
detection limit for K was 160–180 µg g<sup>-1</sup>

**Table S2.** Integral absorbance and analytical uncertainty from repeated analyses of a raw spectrum shown normalised in Figure 3a.

| Parameter                              | Analysis | Cpx in sample M65 |
|----------------------------------------|----------|-------------------|
| $A_i$ (bands 1–3) ( $\text{cm}^{-1}$ ) | #1       | 12.717            |
|                                        | #2       | 13.282            |
|                                        | #3       | 12.907            |
|                                        | #4       | 13.375            |
|                                        | #5       | 13.186            |
|                                        | #6       | 13.258            |
|                                        | #7       | 13.372            |
|                                        | #8       | 12.281            |
|                                        | #9       | 13.012            |
|                                        | #10      | 13.534            |
| $\sigma$ ( $\text{cm}^{-1}$ )          |          | 0.375             |
| $\sigma$ (%)                           |          | 2.86              |

**Table S3.** Selected molar ratios and compositional endmembers of mineral core average compositions (Spengler et al., 2023).

| Sample                      | Cpx           |               | Opx   | Grt   |       |
|-----------------------------|---------------|---------------|-------|-------|-------|
|                             | Mg#           | Jd            | Mg#   | Mg#   | Grs   |
| <i>Opx-bearing eclogite</i> |               |               |       |       |       |
| 2-4A                        | 0.909         | 0.099         | 0.870 | 0.650 | 0.101 |
| DS0326                      | 0.772 – 0.774 | 0.051 – 0.099 | 0.836 | 0.601 | 0.115 |
| DS1409                      | 0.744 – 0.749 | 0.256 – 0.260 | 0.739 | 0.471 | 0.094 |
| DS2216                      | 0.837         | 0.049         | 0.796 | 0.567 | 0.155 |
| M65                         | 0.870 – 0.876 | 0.151 – 0.214 | 0.840 | 0.619 | 0.105 |
| <i>Opx-free eclogite</i>    |               |               |       |       |       |
| DS1438                      | 0.943 – 0.945 | 0.133 – 0.143 |       | 0.743 | 0.322 |
| DS1405                      | 0.792 – 0.799 | 0.279 – 0.302 |       | 0.469 | 0.214 |
| DS2204                      | 0.826 – 0.835 | 0.073 – 0.091 |       | 0.328 | 0.245 |
| DS2217                      | 0.644 – 0.656 | 0.000 – 0.008 |       | 0.233 | 0.219 |
| UL-96-2                     | 0.830 – 0.833 | 0.443 – 0.463 |       | 0.429 | 0.294 |

Mg# =  $\text{Mg}/(\text{Mg} + \text{Fe}^{\text{total}})$ , Grs =  $\text{Ca}/(\text{Mg} + \text{Mn} + \text{Ca} + \text{Fe}^{\text{total}})$

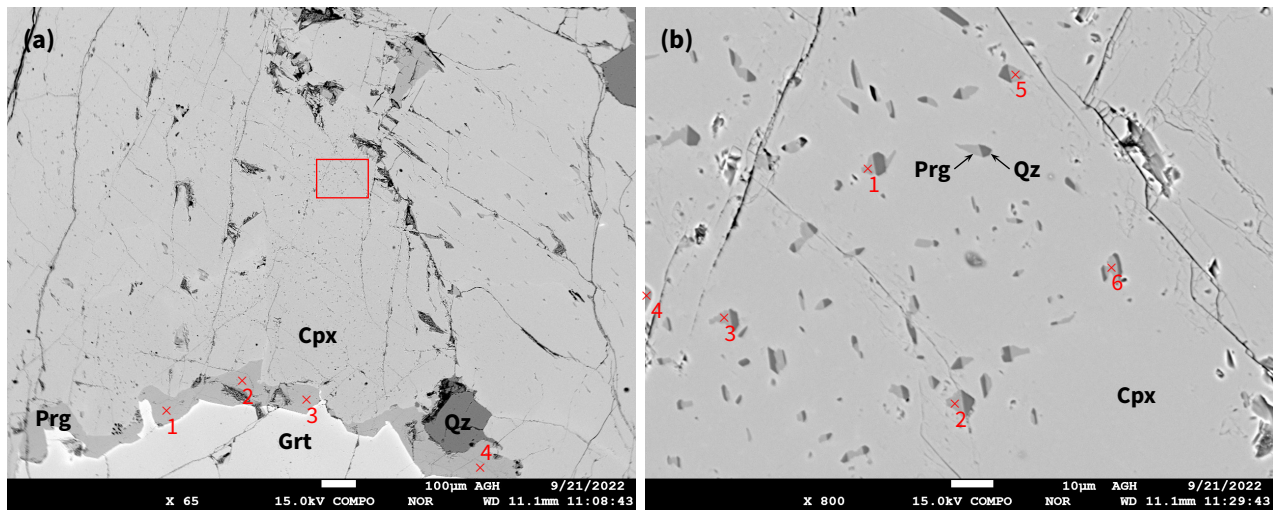

**Figure S1.** Backscattered electron images of Fjortoftvika eclogite DS1438 showing Prg in two textural positions: (a) at grain boundaries between Cpx and Grt and (b) as inclusions in Cpx in close spatial association with Qz. The frame in panel a outlines the position of the image shown in panel b. The labelled crosses mark the position of the mineral chemical analyses, which are shown as average compositions in Table S1.



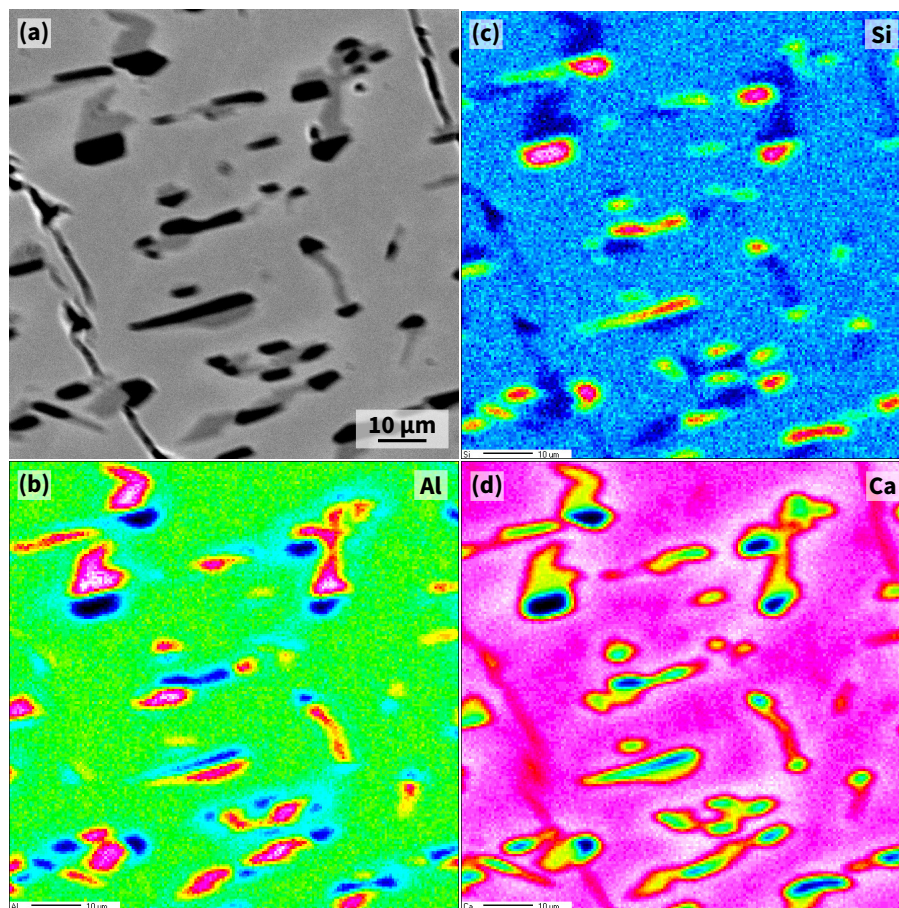

**Figure S2.** Oriented inclusion in Cpx from Korveneset eclogite M65. (a) Backscattered electron image that shows a cross-section surface of part of a Cpx grain (lightgrey) with oriented lamellae a few  $\mu\text{m}$  in width of Prg (darkgrey) and Qz (black). (b–d) Compositional maps of the area shown in panel a for Al, Si and Ca (false-colour images, element concentration increases along the colour changes black–blue–green–red–white).

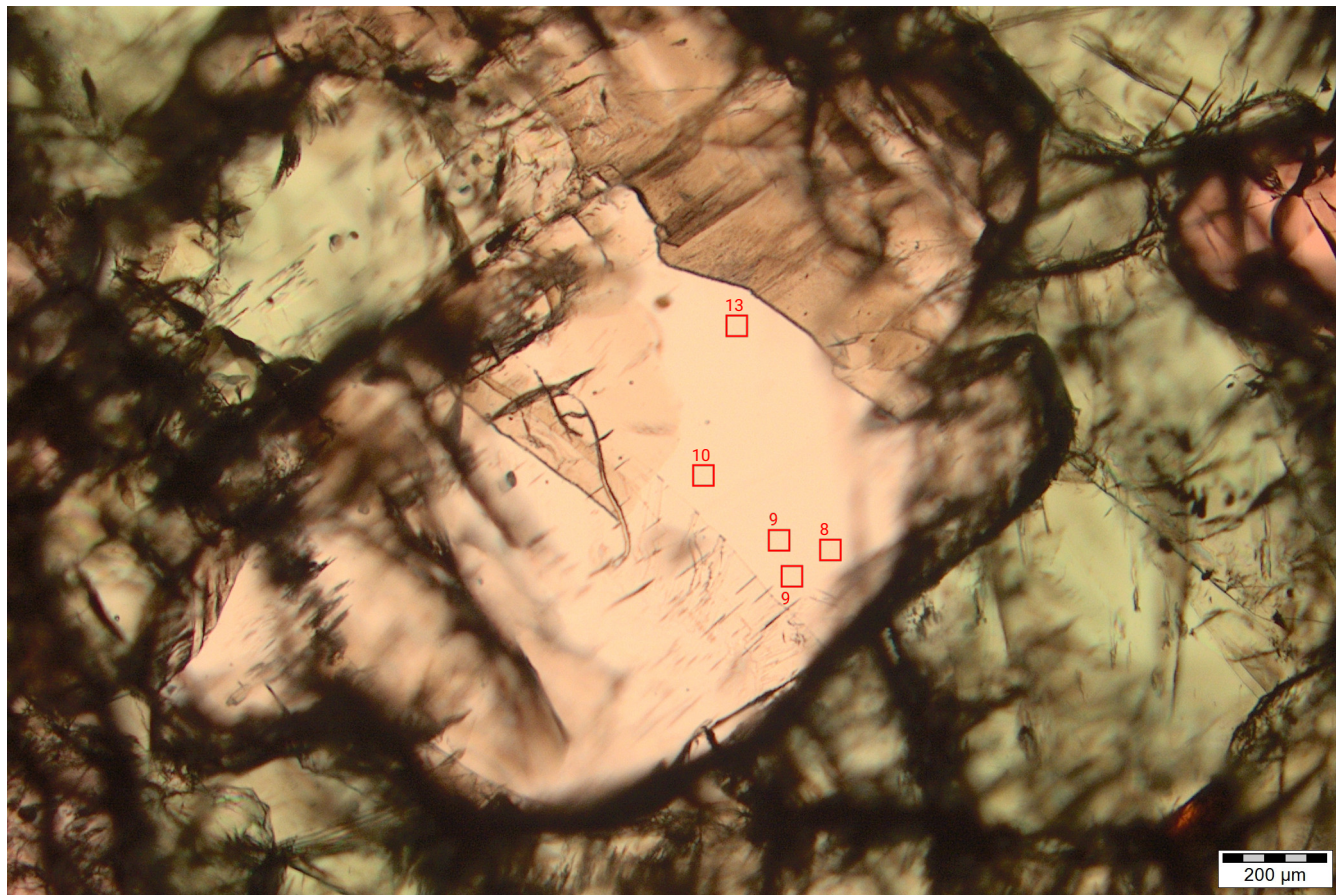

**Figure S3.** Photographic image (PPL) of a polished rock slab with a thickness of 463  $\mu\text{m}$  from sample 2-4A showing an Opx grain (centre) with areas (squares) analysed by FTIR spectroscopy. The numbers refer to the amount of structural hydroxyl (in  $\mu\text{g g}^{-1}$ ) quantified within the analytical areas using the calibration of Bell et al. (1995) and have an error propagated uncertainty ( $1 \sigma$ ) of 5.1 % (see Methods section).



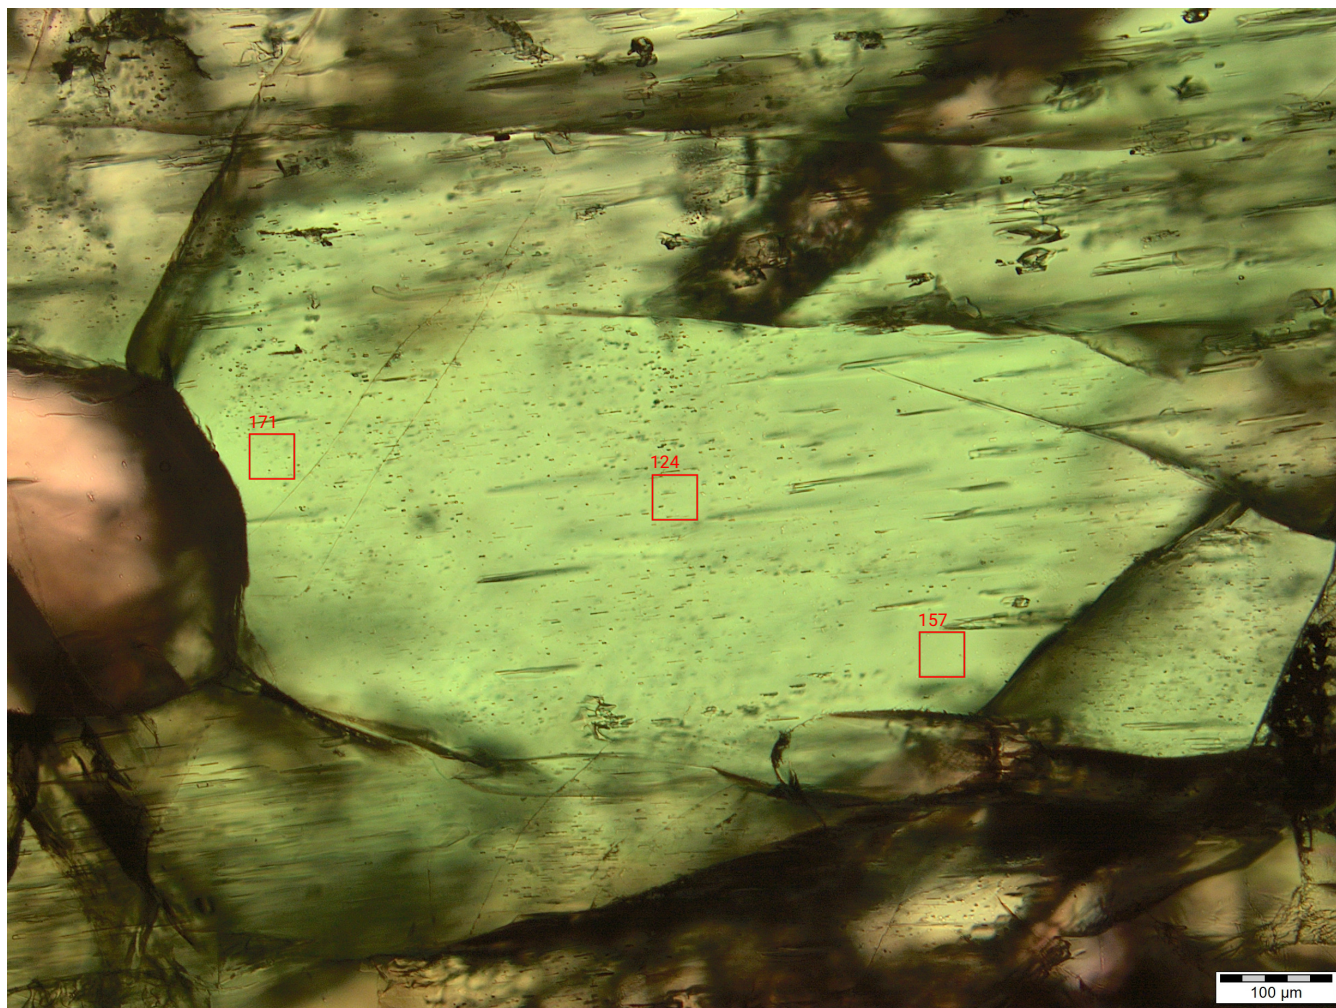

**Figure S4.** Photographic image (PPL) of a polished rock slab with a thickness of 467  $\mu\text{m}$  from sample M65 showing a Cpx grain (centre) with sub-horizontally oriented inclusions of Qz and Prp and areas (squares) analysed by FTIR spectroscopy. The analysis of tiny inclusions could not always be avoided when analysing the host Cpx. The numbers refer to the amount of structural hydroxyl (in  $\mu\text{g g}^{-1}$ ) quantified within the analytical areas using the calibration of Bell et al. (1995) and have an error propagated uncertainty ( $1 \sigma$ ) of 5.5 % (see Methods section).

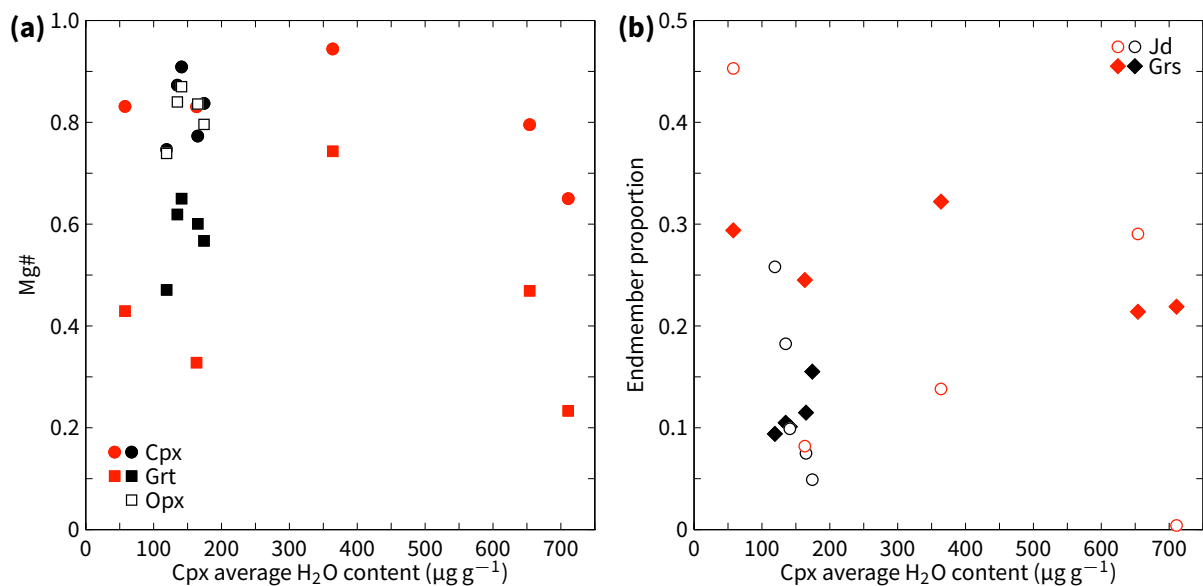

**Figure S5.** Bivariate plots of selected mineral chemistry shown in Table 1 (using the calibration of Bell et al. 1995) and Table S3 (central values were used for data ranges). (a) Mg# vs. average hydroxyl content in Cpx. (b) Endmember proportions vs. average hydroxyl content in Cpx. Symbols in red refer to Opx-free eclogite and others to Opx-bearing eclogite. While the Mg# and the Grs component have little or no effect on the structural hydroxyl content in Cpx, the Jd component shows a negative correlation for most data points.
