# Supplementary material for: Hydroxyl in eclogitic garnet, orthopyroxene, and oriented inclusion-bearing clinopyroxene, western Norway
Source: Copernicus journal article supplement (doi:10.5194/se-16-233-2025), 2025-03-13
Supplement: Supplementary file 3 [file se-16-233-2025-supplement.zip]

## **SUPPLEMENTARY INFORMATION** for

Spengler, D., Koch-Müller, M., Włodek, A., Cuthbert, S.J., and Maika, J. (2025) Hydroxyl in eclogitic garnet, orthopyroxene, and oriented inclusion-bearing clinopyroxene, western Norway. *Solid Earth*. doi: 10.5194/egusphere-2024-2734

This Supplement contains:

- Tables S1–S3 and Figures S1–S5 (pdf)
- Summary of information on FTIR raw spectral files (ods)
- FTIR raw spectral files (zip)
